# Supplementary material for: Dynamics of neurotransmitter and extracellular vesicle-derived microRNA landscapes during heroin and methamphetamine withdrawal
Source: bioRxiv or medRxiv preprint supplement (doi:10.1101/2021.04.19.21255653), 2021-04-22
Supplement: Supplementary file [file media-1.pdf]

# Supplementary information

## Supplementary Figures

Figure S1

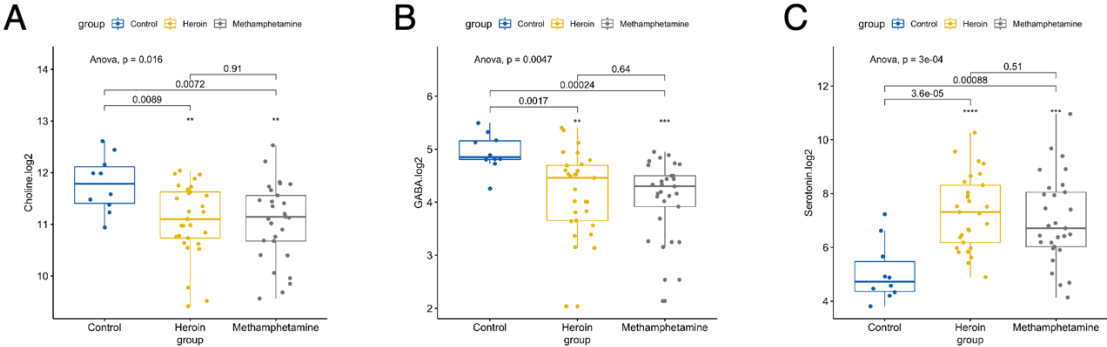

**Figure S1: Differences of serum neurotransmitters in patients with SUDs and healthy controls.** Statistically significances were detected in (A) Choline, (B) GABA, and (C) Serotonin levels between patients with SUDs and healthy controls.

Figure S2

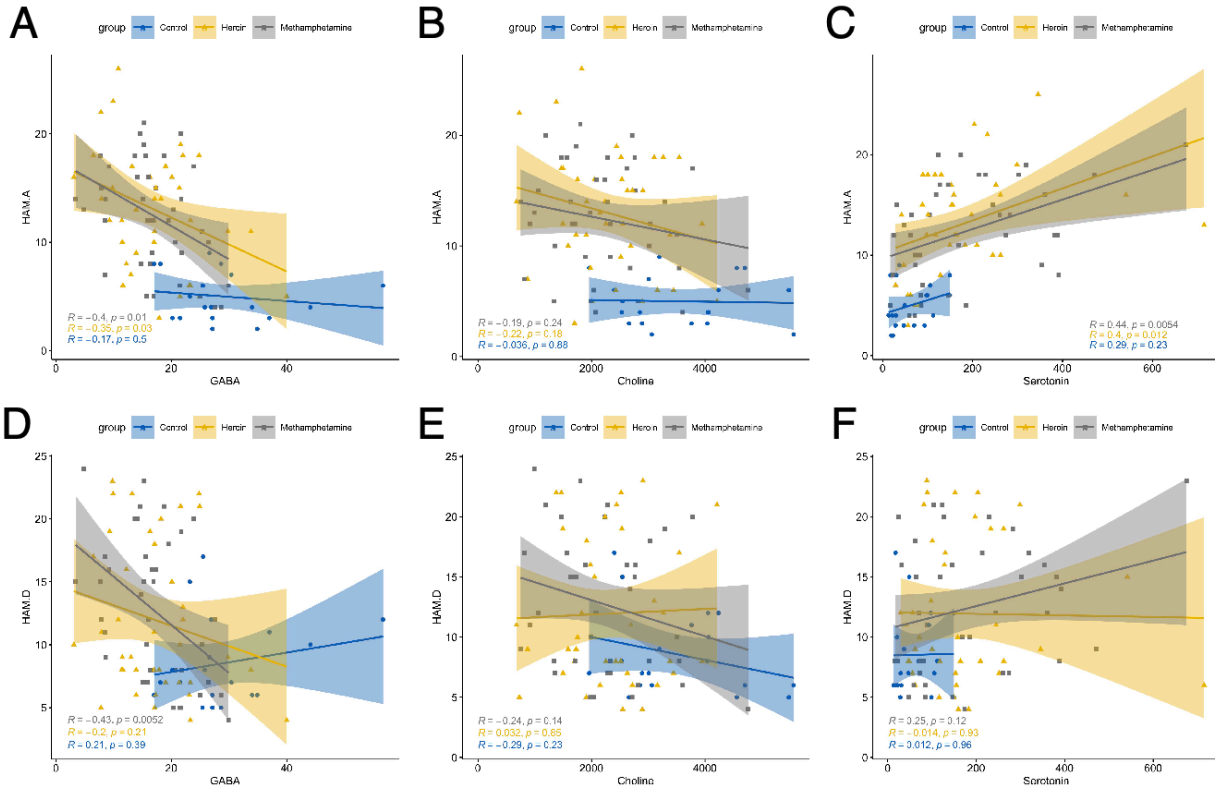

**Figure S2: Sparse canonical correlation analysis.** Sparse canonical correlation analyses were carried out in (A, B, C) HAM-A and (D, E, F) HAM-D scales versus GABA, Choline and Serotonin levels in patients with SUDs.

Figure S3

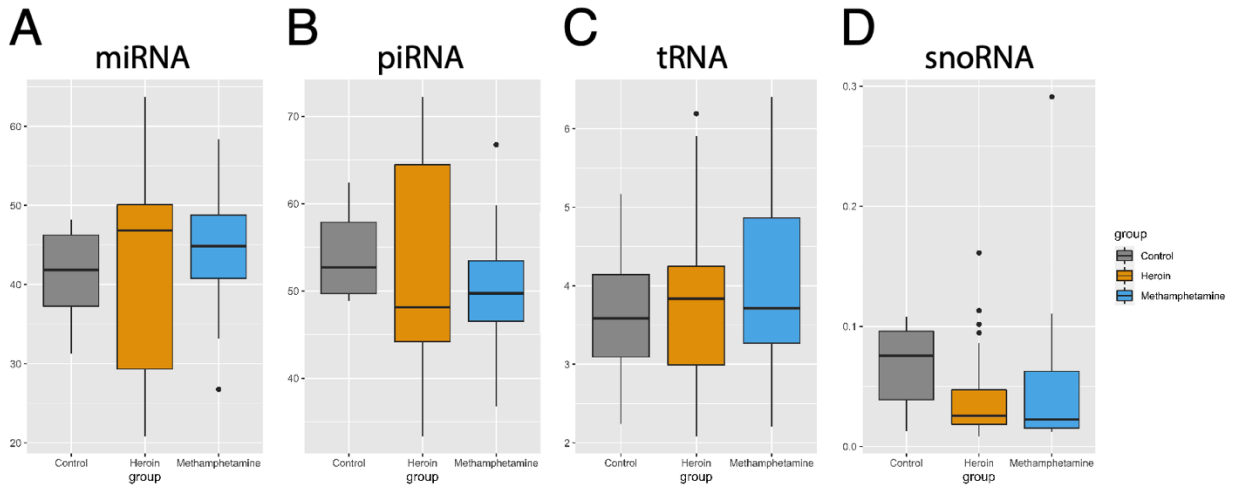

Figure S3: Box plot representing percentage of reads assigned to different RNA species from sequencing, including (A) miRNA, (B) piRNA, (C) tRNA and (D) snoRNA.

Figure S4

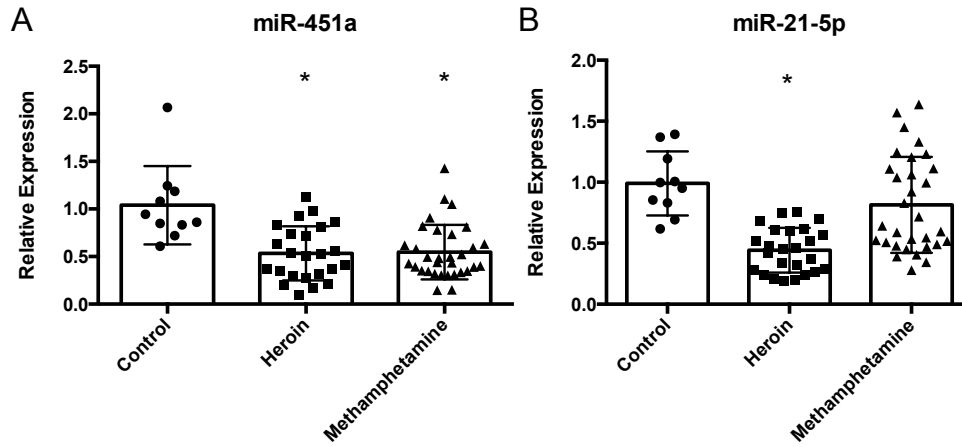

**Figure S4: qPCR validation of identified miRNAs using an independent cohort.** The expressions of (A) miR-451a and (B) miR-21-5p were validated using qPCR. Error bars represent the standard error of the mean of the samples analysed. \* represents  $p < 0.05$ .



Figure S5

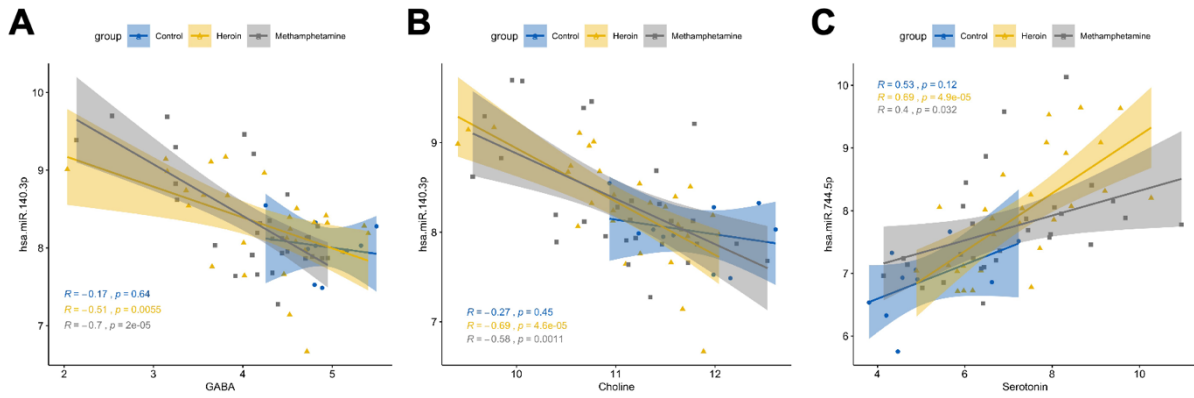

**Figure S5: Sparse canonical correlation analysis.** (A, B) Sparse canonical correlation analyses were carried out in exosomal hsa-miR-140-3p versus GABA (A) and Choline (B), respectively, in patients with SUDs and healthy controls. (C) Sparse canonical correlation analyses were carried out in exosomal hsa-miR-744-5p versus Serotonin in patients with SUDs and healthy controls.

Figure S6

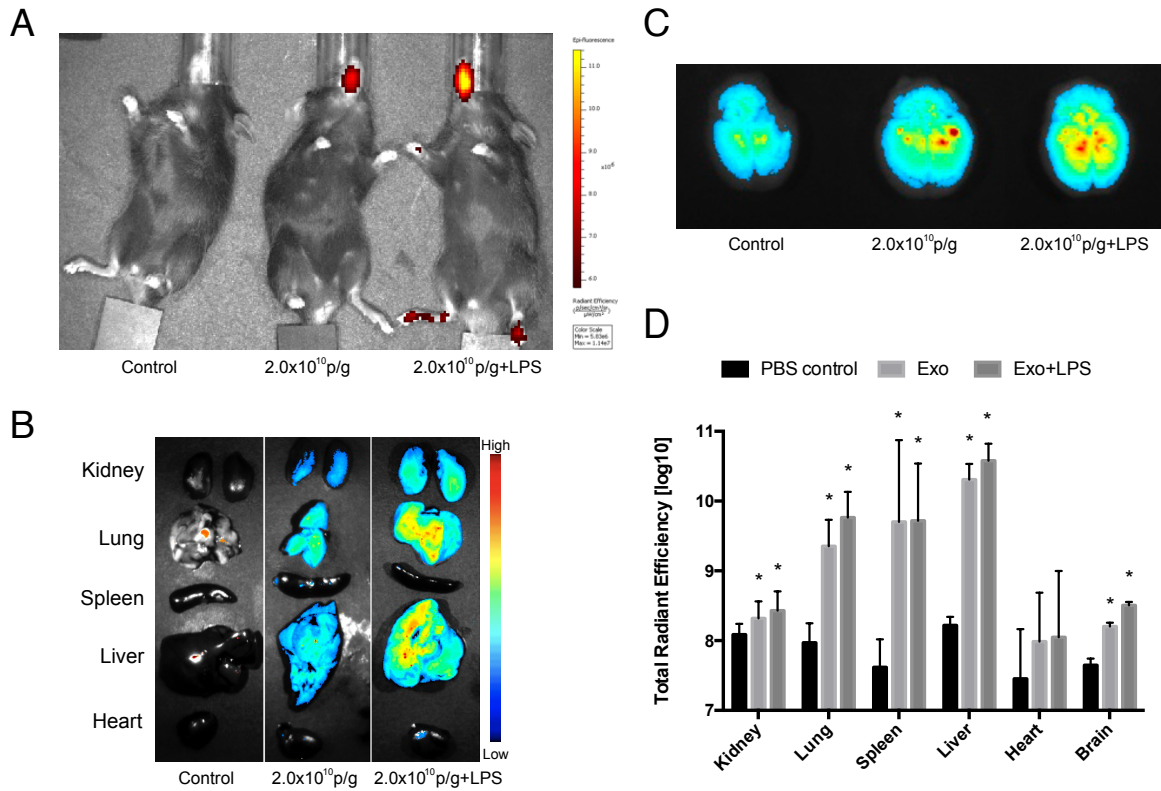

**Figure S6: Distribution of fluorescent lipophilic tracer DiR-labelled exosomes in mice.** (A) Lipopolysaccharide (LPS) or PBS treated C57BL/6 mice ( $n = 3$ /group) were used and freshly purified DiR-labeled exosomes were injected through the tail vein for intravenous injections. The biodistribution of labeled exosomes was examined using  $2.0 \times 10^{10}$  particles/gram body weight (p/g); (B,C) DiR-labeled exosomes were successfully captured in the brain and other organs in mice; (D) A significant increase in DiR-labeled exosomes was captured and measured in the brain and other organs from LPS treated mice ( $n=3$ ).
