# Supplementary material for: Dynamics of neurotransmitter and extracellular vesicle-derived microRNA landscapes during heroin and methamphetamine withdrawal
Source: bioRxiv or medRxiv preprint supplement (doi:10.1101/2021.04.19.21255653), 2021-04-22
Supplement: Supplementary file [file media-2.pdf]

Supplementary Table 1 Characteristics of study participants from the discovery cohort.

|                | mean Heroin subgroup          |            |            | p          | fdr.p         | p             | fdr.p         | p             | fdr.p         | p             | fdr.p  | p      | fdr.p         | p             | fdr.p  |           |
|----------------|-------------------------------|------------|------------|------------|---------------|---------------|---------------|---------------|---------------|---------------|--------|--------|---------------|---------------|--------|-----------|
|                | Control (n=10)                | T1 (n=10)  | T2 (n=10)  |            |               |               |               |               |               |               |        |        |               |               |        | T3 (n=10) |
| Age (year)     | 36.71±7.32                    | 37.73±7.27 | 37.01±8.21 | 37.00±8.05 | 0.7337        | 1.0000        | 0.8501        | 1.0000        | 0.9097        | 1.0000        | 1.0000 | 1.0000 | 0.9699        | 1.0000        | 0.7337 | 1.0000    |
| BMI            | 21.36±1.68                    | 22.13±1.53 | 21.85±1.81 | 22.18±1.53 | 0.3075        | 0.8178        | 0.8501        | 0.8501        | 0.4274        | 0.8178        | 0.5205 | 0.8178 | 0.5452        | 0.8178        | 0.8501 | 0.8501    |
| History (Year) | NA                            | 7.56±2.66  | 7.85±2.42  | 7.99±2.72  | NA            | NA            | NA            | NA            | NA            | NA            | 0.8500 | 0.8501 | 0.8501        | 0.8501        | 0.7913 | 0.8501    |
| Education*     | 1/6/2/1                       | 4/4/1/1    | 3/4/3/0    | 2/4/3/1    | 0.6181        | 1.0000        | 0.5908        | 1.0000        | 0.8363        | 1.0000        | 0.7136 | 1.0000 | 1.0000        | 1.0000        | 0.703  | 1.0000    |
| Income**       | 0/3/4/3/0                     | 2/3/3/1/1  | 2/4/2/1/1  | 1/5/2/2/0  | 0.4984        | 1.0000        | 0.3832        | 1.0000        | 0.6135        | 1.0000        | 1.0000 | 1.0000 | 1.0000        | 1.0000        | 0.7954 | 1.0000    |
| HAM-A          | 4.9±2.42                      | NA         | 15.3±5.76  | 9.2±4.32   | NA            | NA            | <b>0.0004</b> | <b>0.0012</b> | <b>0.0166</b> | <b>0.0188</b> | NA     | NA     | <b>0.0188</b> | <b>0.0188</b> | NA     | NA        |
| HAM-D          | 8.2±3.82                      | NA         | 14.2±6.51  | 11.7±5.23  | NA            | NA            | 0.0807        | 0.1211        | <b>0.0133</b> | <b>0.0399</b> | NA     | NA     | 0.5435        | 0.5435        | NA     | NA        |
|                | mean Methamphetamine subgroup |            |            |            | p             | fdr.p         | p             | fdr.p         | p             | fdr.p         | p      | fdr.p  | p             | fdr.p         | p      | fdr.p     |
|                | Control (n=10)                | T1 (n=10)  | T2 (n=10)  | T3 (n=10)  | Control vs T1 | Control vs T2 | Control vs T3 | T1 vs T2      | T2 vs T3      | T1 vs T3      |        |        |               |               |        |           |
| Age (year)     | 36.71±7.32                    | 36.07±7.77 | 36.93±7.81 | 36.73±8.38 | 0.9097        | 0.9097        | 0.8501        | 0.9097        | 0.9097        | 0.9097        | 0.7913 | 0.9097 | 0.8501        | 0.9097        | 0.7913 | 0.9097    |
| BMI            | 21.36±1.68                    | 21.56±1.69 | 21.70±1.33 | 21.42±1.52 | 0.8501        | 0.9698        | 0.7623        | 0.9698        | 0.7623        | 0.9698        | 0.9698 | 0.9698 | 0.5708        | 0.9698        | 0.5205 | 0.9698    |
| History (Year) | NA                            | 7.4±2.25   | 7.34±3.35  | 7.63±2.93  | NA            | NA            | NA            | NA            | NA            | NA            | 0.8797 | 0.8797 | 0.5708        | 0.8797        | 0.7911 | 0.8797    |
| Education*     | 1/6/2/1                       | 3/3/3/1    | 3/3/4/0    | 3/5/2/0    | 0.6454        | 1.0000        | 0.2862        | 1.0000        | 0.82          | 1.0000        | 1.0000 | 1.0000 | 0.8484        | 1.0000        | 0.8484 | 1.0000    |
| Income**       | 0/3/4/3/0                     | 1/4/2/3/0  | 1/4/2/2/1  | 3/3/1/2/1  | 0.8484        | 1.0000        | 0.7727        | 1.0000        | 0.2525        | 1.0000        | 1.0000 | 1.0000 | 0.9182        | 1.0000        | 0.7954 | 1.0000    |
| HAM-A          | 4.9±2.42                      | NA         | 13.6±3.86  | 9±5.31     | NA            | NA            | <b>0.0006</b> | <b>0.0019</b> | <b>0.0391</b> | <b>0.0409</b> | NA     | NA     | <b>0.0409</b> | <b>0.0409</b> | NA     | NA        |
| HAM-D          | 8.2±3.82                      | NA         | 15.2±5.33  | 11.7±6.36  | NA            | NA            | <b>0.0050</b> | <b>0.0150</b> | 0.2074        | 0.2074        | NA     | NA     | 0.1969        | 0.2074        | NA     | NA        |

Data are mean ± SD. Group differences are evaluated with Kruskal's  $\chi^2$  test for continuous variables and fisher's test for categorical variables. \* Education levels: illiteracy/primary school/middle school/college; \*\* Income levels: monthly 0-1000¥/1000-3000¥/3000-5000¥/5000-10000¥/10000-¥. HAM-A: Hamilton Rating Scale for Anxiety; HAM-D: Hamilton Depression Rating Scale.

Supplementary Table 2. Characteristics of study participants from the validation cohort.

|                | mean Heroin subgroup          |            |            | p          | fdr.p         | p             | fdr.p         | p        | fdr.p    | p        | fdr.p  | p      | fdr.p  |           |               |               |
|----------------|-------------------------------|------------|------------|------------|---------------|---------------|---------------|----------|----------|----------|--------|--------|--------|-----------|---------------|---------------|
|                | Control (n=10)                | T1 (n=9)   | T2 (n=9)   |            |               |               |               |          |          |          |        |        |        | T3 (n=10) | Control vs T1 | Control vs T2 |
| Age (year)     | 36.03±9.05                    | 37.22±7.77 | 36.41±9.77 | 36.87±8.02 | 0.8501        | 1.0000        | 0.9097        | 1.0000   | 0.7913   | 1.0000   | 1.0000 | 1.0000 | 0.9698 | 1.0000    | 0.9699        | 1.0000        |
| BMI            | 22.01±1.6                     | 20.95±2.03 | 21.42±1.93 | 21.76±1.8  | 0.1859        | 0.7913        | 0.5205        | 0.7913   | 0.7913   | 0.7913   | 0.5708 | 0.7913 | 0.6776 | 0.7913    | 0.3847        | 0.7913        |
| History (Year) | NA                            | 7.19±2.97  | 6.17±3.19  | 7.01±2.97  | NA            | NA            | NA            | NA       | NA       | NA       | 0.5205 | 0.7808 | 0.4727 | 0.7808    | 0.8501        | 0.8501        |
| Education*     | 1/4/4/1                       | 2/4/3/1    | 2/2/4/2    | 2/4/2/2    | 1.0000        | 1.0000        | 0.7545        | 1.0000   | 0.7545   | 1.0000   | 0.8636 | 1.0000 | 0.9221 | 1.0000    | 1.0000        | 1.0000        |
| Income**       | 0/4/4/2/0                     | 2/4/2/2/0  | 2/3/3/1/1  | 1/5/3/1/0  | 0.5393        | 1.0000        | 0.6658        | 1.0000   | 1.0000   | 1.0000   | 1.0000 | 1.0000 | 0.9091 | 1.0000    | 1.0000        | 1.0000        |
| HAM-A          | 5.4±2.17                      | NA         | 15.7±4.11  | 13±2.71    | NA            | NA            | 0.0003        | 0.0004   | 0.0002   | 0.0004   | NA     | NA     | 0.0808 | 0.0808    | NA            | NA            |
| HAM-D          | 8.8±3.05                      | NA         | 15.4±6.35  | 10.9±6.62  | NA            | NA            | 0.0306        | 0.0917   | 0.8791   | 0.8791   | NA     | NA     | 0.1725 | 0.2587    | NA            | NA            |
|                | mean Methamphetamine subgroup |            |            |            |               |               |               |          |          |          |        |        |        |           |               |               |
|                | Control (n=10)                | T1 (n=9)   | T2 (n=9)   | T3 (n=10)  | Control vs T1 | Control vs T2 | Control vs T3 | T1 vs T2 | T2 vs T3 | T1 vs T3 |        |        |        |           |               |               |
| Age (year)     | 36.03±9.05                    | 36.36±8.36 | 35.95±7.9  | 36.54±9.78 | 1.0000        | 1.0000        | 0.9699        | 1.0000   | 1.0000   | 1.0000   | 0.9097 | 1.0000 | 0.7337 | 1.0000    | 0.7913        | 1.0000        |
| BMI            | 22.01±1.6                     | 21.85±1.74 | 21.86±1.01 | 21.02±0.84 | 0.9698        | 0.9698        | 0.9097        | 0.9698   | 0.1986   | 0.3972   | 0.7911 | 0.9698 | 0.0639 | 0.2270    | 0.0757        | 0.2270        |
| History (Year) | NA                            | 7.29±2.99  | 7.62±2.12  | 6.26±2.39  | NA            | NA            | NA            | NA       | NA       | NA       | 0.6500 | 0.7337 | 0.2413 | 0.7239    | 0.7337        | 0.7337        |
| Education*     | 1/4/4/1                       | 3/2/3/2    | 2/4/2/2    | 2/3/4/1    | 0.6704        | 1.0000        | 0.7545        | 1.0000   | 1.0000   | 1.0000   | 0.8701 | 1.0000 | 0.8636 | 1.0000    | 1.0000        | 1.0000        |
| Income**       | 0/4/4/2/0                     | 1/5/2/2/0  | 2/3/0/3/2  | 2/3/3/2/0  | 0.8363        | 0.8636        | 0.08236       | 0.4942   | 0.7348   | 0.8636   | 0.4484 | 0.8636 | 0.3647 | 0.8636    | 0.8636        | 0.8636        |
| HAM-A          | 5.4±2.17                      | NA         | 16.1±3.87  | 11±3.86    | NA            | NA            | 0.0002        | 0.0005   | 0.0039   | 0.0058   | NA     | NA     | 0.0166 | 0.0166    | NA            | NA            |
| HAM-D          | 8.8±3.05                      | NA         | 16.3±4.37  | 11.3±5.93  | NA            | NA            | 0.0014        | 0.0043   | 0.5681   | 0.5681   | NA     | NA     | 0.0634 | 0.0951    | NA            | NA            |

Data are mean ± SD. Group differences are evaluated with Kruskal's  $\chi^2$  test for continuous variables and fisher's test for categorical variables. \* Education levels: illiteracy/primary school/middle school/college; \*\* Income levels: monthly 0-1000¥/1000-3000¥/3000-5000¥/5000-10000¥/10000¥+. HAM-A: Hamilton Rating Scale for Anxiety; HAM-D: Hamilton Depression Rating Scale.

**Supplementary Table 3** Detailed information of the 14 neurotransmitters in UPLC-MS/MS

| No. | Metabolites                 | HMDB ID     |
|-----|-----------------------------|-------------|
| 1   | $\gamma$ -Aminobutyric acid | HMDB0000112 |
| 2   | Glutamine                   | HMDB0003423 |
| 3   | Glutamate                   | HMDB0000148 |
| 4   | Glutathione                 | HMDB0000125 |
| 5   | Tryptophan                  | HMDB0000929 |
| 6   | Choline                     | HMDB0000097 |
| 7   | Phosphocholine              | HMDB0001565 |
| 8   | Tyramine                    | HMDB0000306 |
| 9   | Serotonin                   | HMDB0000259 |
| 10  | Myo-inositol                | HMDB0000211 |
| 11  | Dopamine                    | HMDB0000073 |
| 12  | 5-Hydroxyindole acetic acid | HMDB0001855 |
| 13  | Epinephrine                 | HMDB0000068 |
| 14  | Kynurenine                  | HMDB0000684 |

**Supplementary Table 4. Detailed information of the neurotransmitters isolated from peripheral blood plasma of HC, HDPS and MDPs from the validation cohort**

| Metabolites   | mean              |                   | p                         |                   | fdr, p            |                            | p                          |                           | fdr, p                    |                           |
|---------------|-------------------|-------------------|---------------------------|-------------------|-------------------|----------------------------|----------------------------|---------------------------|---------------------------|---------------------------|
|               | Control<br>(n=10) | Heroin<br>(n=30)  | Methamphetamine<br>(n=30) | Control vs Heroin | Control vs Heroin | Control vs Methamphetamine | Control vs Methamphetamine | Heroin vs Methamphetamine | Heroin vs Methamphetamine | Heroin vs Methamphetamine |
| Choline       | 3639.23±978.58    | 2484.73±604.82    | 2341.57±641.27            | <b>0.0008*</b>    | 0.0012            | <b>0.0005*</b>             | 0.0012                     | 0.2739                    | 0.2739                    | 0.2739                    |
| GABA          | 28.38±11.39       | 17.70±6.32        | 17.24±4.17                | <b>0.0006*</b>    | <b>0.0009</b>     | <b>0.0002*</b>             | <b>0.0006</b>              | 0.9117                    | 0.9117                    | 0.9117                    |
| Glutamic acid | 47698.77±35785.73 | 37640.50±18612.48 | 30323.27±11312.50         | 1.0000            | 1.0000            | 0.1949                     | 0.2924                     | <b>0.0232*</b>            | 0.2838                    | 0.0696                    |
| Glutamine     | 10040.83±6513.06  | 7406.37±1668.19   | 8005.35±1850.10           | 0.1221            | 0.3663            | 0.7194                     | 0.7194                     | 0.2838                    | 0.4257                    | 0.4257                    |
| Kynurenine    | 1759.80±723.00    | 1363.88±646.31    | 1380.89±645.64            | 0.1147            | 0.1720            | 0.1147                     | 0.1720                     | 0.7731                    | 0.7731                    | 0.7731                    |
| Serotonin     | 79.08±38.78       | 317.00±298.67     | 317.30±280.52             | <b>0.0001*</b>    | <b>0.0003</b>     | <b>0.0003*</b>             | <b>0.0004</b>              | 0.6843                    | 0.6843                    | 0.6843                    |
| Tryptophan    | 24921.68±4269.84  | 20620.83±4911.53  | 23067.06±5320.18          | <b>0.0255*</b>    | 0.0765            | 0.2675                     | 0.2675                     | 0.1154                    | 0.1154                    | 0.1731                    |

Data are mean ± SD. Group differences are evaluated with Kruskal's t test for continuous variables and fisher's test for categorical variables.

**Supplementary Table 5. Subgroup analysis of 7 neurotransmitters isolated from peripheral blood plasma of HC, HDPs and MDPs.**

| Metabolites   | mean Heroin subgroup |                               |                 | p               | fdr-p         | p             | fdr-p         | p             | fdr-p         | p             | fdr-p         | p             | fdr-p         | p             | fdr-p         |               |
|---------------|----------------------|-------------------------------|-----------------|-----------------|---------------|---------------|---------------|---------------|---------------|---------------|---------------|---------------|---------------|---------------|---------------|---------------|
|               | Control (n=10)       | T1 (n=10)                     | T2 (n=10)       |                 |               |               |               |               |               |               |               |               |               |               |               | T3 (n=10)     |
| Glutamine     | 10040.83±            | 6550.29±1433.48               | 7491.73±1594.10 | 8177.11±1699.56 | <b>0.0113</b> | 0.0678        | 0.2413        | 0.3620        | 1.0000        | 1.0000        | 0.1212        | 0.2424        | 0.3847        | 0.4616        | <b>0.0452</b> | 0.1355        |
|               | 6513.06              |                               |                 |                 |               |               |               |               |               |               |               |               |               |               |               |               |
|               | 24921.68±            | 18988.44±                     | 20849.91±       | 22024.15±       | 0.0539        | 0.1617        | <b>0.0452</b> | 0.1617        | 0.1620        | 0.3239        | 0.6232        | 0.6232        | 0.5708        | 0.6232        | 0.2730        | 0.4096        |
| Tryptophan    | 4269.84              | 6345.78                       | 4313.04         | 3694.80         |               |               |               |               |               |               |               |               |               |               |               |               |
| Choline       | 3639.23±978.58       | 2615.30±609.90                | 2274.89±638.28  | 2564.01±569.62  | <b>0.0211</b> | <b>0.0422</b> | <b>0.0022</b> | <b>0.0132</b> | <b>0.0073</b> | <b>0.0219</b> | 0.1211        | 0.1816        | 0.2730        | 0.3276        | 0.5204        | 0.5204        |
|               |                      |                               |                 |                 |               |               |               |               |               |               |               |               |               |               |               |               |
|               | 28.38±11.39          | 20.33±8.28                    | 14.07±5.03      | 18.71±3.35      | <b>0.0211</b> | <b>0.0423</b> | <b>0.0008</b> | <b>0.0046</b> | <b>0.0091</b> | <b>0.0273</b> | 0.0890        | 0.1068        | 0.0539        | 0.0809        | 0.7337        | 0.7337        |
| GABA          | 47698.77±            | 43557.35±                     | 31334.81        | 38029.35±       | 0.9698        | 0.9698        | 0.4727        | 0.7808        | 0.5205        | 0.7808        | 0.3447        | 0.7808        | 0.1041        | 0.6247        | 0.7337        | 0.8805        |
| Glutamic acid | 35785.73             | 30121.80                      | ±7359.47        | 8457.26         |               |               |               |               |               |               |               |               |               |               |               |               |
|               |                      |                               |                 |                 |               |               |               |               |               |               |               |               |               |               |               |               |
|               | 79.08±38.78          | 531.14±396.70                 | 278.38±200.17   | 141.48±56.23    | <b>0.0002</b> | <b>0.0015</b> | <b>0.0013</b> | <b>0.0039</b> | <b>0.0173</b> | <b>0.0259</b> | 0.1041        | 0.1041        | 0.0539        | 0.0647        | <b>0.0022</b> | <b>0.0044</b> |
| Serotonin     | 1759.80±723.00       | 1273.71±527.54                | 1510.07±876.60  | 1307.87±512.81  | 0.1405        | 0.4214        | 0.4727        | 0.6246        | 0.1212        | 0.4214        | 0.5205        | 0.6246        | 0.4727        | 0.6246        | 1.0000        | 1.0000        |
| Kynurenine    |                      |                               |                 |                 |               |               |               |               |               |               |               |               |               |               |               |               |
| Metabolites   | mean                 | mean Methamphetamine subgroup |                 |                 | p             | fdr-p         | p             | fdr-p         | p             | fdr-p         | p             | fdr-p         | p             | fdr-p         | p             | fdr-p         |
|               | Control (n=10)       | T1 (n=10)                     | T2 (n=10)       | T3 (n=10)       |               |               |               |               |               |               |               |               |               |               |               |               |
| Glutamine     | 10040.83±            | 7041.57±1466.38               | 7862.24±1363.41 | 9112.23±2145.69 | 0.0757        | 0.2107        | 0.9698        | 0.9698        | 0.4274        | 0.5128        | 0.1212        | 0.2107        | 0.1405        | 0.2107        | 0.0312        | 0.1873        |
|               | 6513.06              |                               |                 |                 |               |               |               |               |               |               |               |               |               |               |               |               |
|               | 24921.68±            | 21431.59±                     | 23593.16±       | 24176.45±       | 0.0757        | 0.4540        | 0.7337        | 0.8805        | 0.6232        | 0.8805        | 0.3075        | 0.8805        | 0.9097        | 0.9097        | 0.4727        | 0.8805        |
| Tryptophan    | 4269.84              | 4630.92                       | 6200.37         | 5163.90         |               |               |               |               |               |               |               |               |               |               |               |               |
| Choline       | 3639.23±978.58       | 2572.38±591.69                | 1877.25±492.63  | 2575.08±610.70  | <b>0.0140</b> | <b>0.0207</b> | <b>0.0006</b> | <b>0.0035</b> | <b>0.0140</b> | <b>0.0207</b> | <b>0.0173</b> | <b>0.0207</b> | <b>0.0113</b> | <b>0.0207</b> | 0.9097        | 0.9097        |
|               |                      |                               |                 |                 |               |               |               |               |               |               |               |               |               |               |               |               |
|               | 28.38±11.39          | 18.55±4.33                    | 14.18±3.21      | 19.00±3.36      | <b>0.0140</b> | <b>0.0280</b> | <b>0.0002</b> | <b>0.0011</b> | <b>0.0091</b> | <b>0.0273</b> | <b>0.0376</b> | <b>0.0452</b> | <b>0.0257</b> | <b>0.0386</b> | 0.5708        | 0.5708        |
| GABA          | 47698.77±            | 29036.45±                     | 30838.97±       | 31094.38±       | 0.3075        | 0.6894        | 0.3447        | 0.6894        | 0.2730        | 0.6894        | 0.7913        | 1.0000        | 0.9698        | 1.0000        | 1.0000        | 1.0000        |
| Glutamic acid | 35785.73             | 7561.09                       | 12857.25        | 13677.77        |               |               |               |               |               |               |               |               |               |               |               |               |
|               |                      |                               |                 |                 |               |               |               |               |               |               |               |               |               |               |               |               |
|               | 79.08±38.78          | 449.57±420.04                 | 317.44±158.63   | 184.91±114.23   | <b>0.0046</b> | <b>0.0138</b> | <b>0.0003</b> | <b>0.0020</b> | <b>0.0257</b> | <b>0.0515</b> | 0.8501        | 0.8501        | 0.0757        | 0.1135        | 0.1212        | 0.1455        |
| Serotonin     | 1759.80±723.00       | 1229.36±326.57                | 1210.30±457.73  | 1703.00±924.05  | <b>0.0452</b> | 0.2082        | 0.1041        | 0.2082        | 0.9097        | 0.9698        | 0.9698        | 0.9698        | 0.2123        | 0.3184        | 0.0890        | 0.2082        |
| Kynurenine    |                      |                               |                 |                 |               |               |               |               |               |               |               |               |               |               |               |               |

Data are mean ± SD. Group differences are evaluated with Kruskal's t test for continuous variables and Fisher's test for categorical variables.

**Supplementary Table 6. Sequencing Quality Statist**

| Sample      | Number of reads |                |                  |           |             | Number of miRNA |                |
|-------------|-----------------|----------------|------------------|-----------|-------------|-----------------|----------------|
|             | Raw reads       | Length trimmed | Quality filtered | N trimmed | Clean reads | Known           | Putative novel |
| All samples | 1575073176      | 625036325      | 625036325        | 625030902 | 625030902   | 1523            | 157            |
| C.01        | 28951357        | 6993344        | 6993344          | 6993340   | 6993340     | 612             | 22             |
| C.02        | 24323530        | 5710597        | 5710597          | 5710596   | 5710596     | 552             | 21             |
| C.03        | 25745696        | 8515690        | 8515690          | 8515689   | 8515689     | 598             | 24             |
| C.04        | 23373769        | 8358123        | 8358123          | 8358122   | 8358122     | 662             | 26             |
| C.05        | 20854033        | 5018514        | 5018514          | 5018512   | 5018512     | 436             | 24             |
| C.06        | 23011904        | 8686982        | 8686982          | 8686979   | 8686979     | 646             | 27             |
| C.07        | 19440842        | 4939177        | 4939177          | 4939170   | 4939170     | 468             | 16             |
| C.08        | 23087794        | 8468396        | 8468396          | 8468392   | 8468392     | 592             | 31             |
| C.09        | 25512976        | 7368351        | 7368351          | 7368347   | 7368347     | 618             | 21             |
| C.10        | 21970702        | 7339262        | 7339262          | 7339252   | 7339252     | 614             | 24             |
| H1.1        | 22961536        | 9956030        | 9956030          | 9956030   | 9956030     | 698             | 35             |
| H1.2        | 19931639        | 8877600        | 8877600          | 8877599   | 8877599     | 613             | 21             |
| H1.3        | 20466688        | 8784872        | 8784872          | 8784868   | 8784868     | 396             | 12             |
| H1.4        | 23550416        | 9231064        | 9231064          | 9231064   | 9231064     | 492             | 16             |
| H1.5        | 22312916        | 9901625        | 9901625          | 9901625   | 9901625     | 580             | 23             |
| H1.6        | 21742872        | 9960966        | 9960966          | 9960966   | 9960966     | 609             | 29             |
| H1.7        | 23151988        | 12515142       | 12515142         | 12515142  | 12515142    | 653             | 23             |
| H1.8        | 24137578        | 7783240        | 7783240          | 7783240   | 7783240     | 482             | 20             |
| H1.9        | 20629386        | 8998094        | 8998094          | 8998094   | 8998094     | 619             | 29             |
| H2.1        | 18770486        | 6947738        | 6947738          | 6947738   | 6947738     | 438             | 12             |
| H2.2        | 19452501        | 8092496        | 8092496          | 8090758   | 8090758     | 360             | 10             |
| H2.3        | 30102744        | 13926937       | 13926937         | 13926937  | 13926937    | 510             | 21             |
| H2.4        | 20519446        | 9806286        | 9806286          | 9806286   | 9806286     | 528             | 19             |
| H2.5        | 20054726        | 8762403        | 8762403          | 8762403   | 8762403     | 655             | 21             |
| H2.6        | 20632304        | 9825993        | 9825993          | 9825990   | 9825990     | 597             | 23             |
| H2.7        | 20027723        | 10135235       | 10135235         | 10135235  | 10135235    | 479             | 15             |
| H2.8        | 17216335        | 6483377        | 6483377          | 6483376   | 6483376     | 489             | 23             |
| H2.9        | 20277871        | 7682860        | 7682860          | 7682860   | 7682860     | 501             | 18             |
| H2.10       | 18488431        | 7421336        | 7421336          | 7421334   | 7421334     | 486             | 14             |
| H3.1        | 20163084        | 8897080        | 8897080          | 8897060   | 8897060     | 321             | 9              |
| H3.2        | 33321634        | 10892910       | 10892910         | 10892910  | 10892910    | 452             | 14             |
| H3.3        | 23960767        | 12740051       | 12740051         | 12740051  | 12740051    | 523             | 25             |
| H3.4        | 22811526        | 10904450       | 10904450         | 10904450  | 10904450    | 438             | 20             |

|       |          |          |          |          |          |     |    |
|-------|----------|----------|----------|----------|----------|-----|----|
| H3.5  | 21481696 | 10888465 | 10888465 | 10888465 | 10888465 | 540 | 17 |
| H3.6  | 25475566 | 11963806 | 11963806 | 11963806 | 11963806 | 484 | 16 |
| H3.7  | 22163682 | 10646737 | 10646737 | 10646737 | 10646737 | 484 | 11 |
| H3.8  | 19209212 | 9263671  | 9263671  | 9263671  | 9263671  | 435 | 13 |
| H3.9  | 20427766 | 8026759  | 8026759  | 8026753  | 8026753  | 384 | 13 |
| H3.10 | 23919430 | 10474858 | 10474858 | 10474858 | 10474858 | 357 | 9  |
| M1.1  | 20872402 | 7228699  | 7228699  | 7228699  | 7228699  | 452 | 17 |
| M1.2  | 20097637 | 7595432  | 7595432  | 7595432  | 7595432  | 455 | 21 |
| M1.3  | 18206676 | 6112801  | 6112801  | 6112801  | 6112801  | 577 | 24 |
| M1.4  | 21754137 | 6015848  | 6015848  | 6015848  | 6015848  | 462 | 13 |
| M1.5  | 26026823 | 8548506  | 8548506  | 8548506  | 8548506  | 588 | 25 |
| M1.6  | 23213882 | 9173126  | 9173126  | 9173126  | 9173126  | 696 | 25 |
| M1.7  | 19352539 | 6250781  | 6250781  | 6250781  | 6250781  | 553 | 27 |
| M1.8  | 24561326 | 7055055  | 7055055  | 7055055  | 7055055  | 649 | 25 |
| M1.9  | 26054761 | 8762625  | 8762625  | 8762625  | 8762625  | 675 | 33 |
| M1.10 | 31357518 | 9885420  | 9885420  | 9885420  | 9885420  | 577 | 27 |
| M2.1  | 18686291 | 7814755  | 7814755  | 7814753  | 7814753  | 516 | 20 |
| M2.2  | 19003637 | 4690820  | 4690820  | 4690194  | 4690194  | 380 | 10 |
| M2.3  | 19159441 | 8429956  | 8429956  | 8429955  | 8429955  | 494 | 18 |
| M2.4  | 19387191 | 7719314  | 7719314  | 7719314  | 7719314  | 432 | 9  |
| M2.5  | 17760736 | 6064302  | 6064302  | 6064302  | 6064302  | 442 | 13 |
| M2.6  | 18348826 | 8840170  | 8840170  | 8839600  | 8839600  | 560 | 21 |
| M2.7  | 19776356 | 9027219  | 9027219  | 9026441  | 9026441  | 591 | 36 |
| M2.8  | 19283791 | 8803941  | 8803941  | 8803140  | 8803140  | 590 | 27 |
| M2.9  | 19239913 | 10264909 | 10264909 | 10264909 | 10264909 | 664 | 33 |
| M2.10 | 18085579 | 8621063  | 8621063  | 8620323  | 8620323  | 438 | 26 |
| M3.1  | 25300934 | 11235627 | 11235627 | 11235601 | 11235601 | 380 | 16 |
| M3.2  | 28112666 | 12467506 | 12467506 | 12467485 | 12467485 | 410 | 11 |
| M3.3  | 20079964 | 9616208  | 9616208  | 9616208  | 9616208  | 559 | 20 |
| M3.4  | 25344093 | 8302942  | 8302942  | 8302935  | 8302935  | 480 | 17 |
| M3.5  | 38967719 | 13921590 | 13921590 | 13921590 | 13921590 | 474 | 19 |
| M3.6  | 16743902 | 7661639  | 7661639  | 7661630  | 7661630  | 397 | 16 |
| M3.7  | 24695439 | 9676900  | 9676900  | 9676885  | 9676885  | 546 | 18 |
| M3.8  | 25928401 | 14050022 | 14050022 | 14050022 | 14050022 | 516 | 18 |
| M3.9  | 23066766 | 8917392  | 8917392  | 8917384  | 8917384  | 505 | 18 |
| M3.10 | 31323165 | 12397377 | 12397377 | 12397377 | 12397377 | 463 | 22 |

Supplementary Table 7 Length distribution analysis of the miRNAs in all samples

| ID    | group    | 18      | 19     | 20      | 21      | 22      | 23      | 24     | 25     | 26     | 27     | 28     | 29     | 30     | 31      | 32       | total reads |
|-------|----------|---------|--------|---------|---------|---------|---------|--------|--------|--------|--------|--------|--------|--------|---------|----------|-------------|
| C.01  | Control  | 650043  | 532467 | 628105  | 888367  | 1770639 | 613854  | 385832 | 273844 | 227456 | 228964 | 183021 | 165546 | 164801 | 135373  | 145028   | 6993340     |
| C.02  | Control  | 534072  | 439579 | 502974  | 768574  | 1408844 | 489498  | 314626 | 236057 | 193133 | 183385 | 151276 | 138466 | 135793 | 106426  | 107893   | 5710596     |
| C.03  | Control  | 646552  | 527933 | 772748  | 1340507 | 2653662 | 677943  | 387039 | 286215 | 230750 | 213093 | 179690 | 164440 | 161290 | 134569  | 139258   | 8515689     |
| C.04  | Control  | 477425  | 437886 | 959468  | 1249250 | 2907923 | 700784  | 318813 | 235732 | 198545 | 179231 | 155995 | 148536 | 148548 | 121751  | 118235   | 8358122     |
| C.05  | Control  | 446295  | 402612 | 453875  | 604271  | 1033860 | 450850  | 308066 | 239827 | 192791 | 182461 | 156708 | 146780 | 151495 | 121327  | 127294   | 5018512     |
| C.06  | Control  | 646289  | 513768 | 711379  | 1177638 | 3036447 | 739642  | 408957 | 276031 | 220075 | 202023 | 168074 | 157781 | 160382 | 128278  | 140215   | 8686979     |
| C.07  | Control  | 423937  | 376288 | 441266  | 628269  | 1246088 | 433319  | 284033 | 208173 | 165561 | 158203 | 132844 | 121533 | 121970 | 96219   | 101467   | 4991700     |
| C.08  | Control  | 561027  | 504944 | 713230  | 1228081 | 2769359 | 721781  | 415608 | 287105 | 234394 | 228915 | 182299 | 169066 | 170485 | 133744  | 148354   | 8468392     |
| C.09  | Control  | 479728  | 421269 | 620857  | 1012013 | 2539965 | 629098  | 356677 | 241263 | 192578 | 179110 | 151668 | 145882 | 151190 | 124536  | 122513   | 7368347     |
| C.10  | Control  | 525877  | 466738 | 646425  | 955406  | 2085276 | 569991  | 375666 | 286932 | 250162 | 240177 | 212625 | 203700 | 194502 | 164562  | 162123   | 7339252     |
| H1.1  | Heroin   | 1660736 | 548416 | 731861  | 1126337 | 2660349 | 818166  | 483192 | 323657 | 280477 | 328455 | 239075 | 211319 | 201063 | 166169  | 176758   | 9956030     |
| H1.2  | Heroin   | 1580145 | 556901 | 612777  | 916087  | 1773159 | 725396  | 491333 | 361411 | 326885 | 347016 | 278321 | 252133 | 244204 | 207024  | 204807   | 8877599     |
| H1.3  | Heroin   | 1192259 | 609663 | 676979  | 914863  | 1262139 | 695119  | 549158 | 483613 | 421267 | 416559 | 358109 | 338278 | 332592 | 275071  | 259199   | 8784868     |
| H1.4  | Heroin   | 1676745 | 644714 | 658591  | 872768  | 1418045 | 700639  | 533535 | 431686 | 389158 | 392804 | 335224 | 30375  | 320208 | 271766  | 264806   | 9231064     |
| H1.5  | Heroin   | 1778763 | 655053 | 715652  | 1087205 | 2113406 | 752124  | 507031 | 398840 | 343331 | 331640 | 281148 | 260359 | 254001 | 212698  | 210374   | 9901625     |
| H1.6  | Heroin   | 2625168 | 597783 | 605433  | 968898  | 1879401 | 735018  | 481268 | 310881 | 286460 | 340612 | 251492 | 226780 | 251312 | 205131  | 195329   | 9960966     |
| H1.7  | Heroin   | 3730302 | 631339 | 627165  | 1185372 | 2320921 | 1295824 | 527086 | 346773 | 318219 | 411897 | 276659 | 239797 | 228627 | 190981  | 184270   | 12515142    |
| H1.8  | Heroin   | 820471  | 624097 | 650866  | 813826  | 1307189 | 661667  | 498974 | 407892 | 357672 | 354728 | 301171 | 275883 | 260986 | 224735  | 223083   | 7783240     |
| H1.9  | Heroin   | 709896  | 518366 | 685562  | 1152876 | 2435536 | 828297  | 516997 | 348868 | 306942 | 352848 | 272019 | 236062 | 230406 | 195914  | 207505   | 8998094     |
| H2.1  | Heroin   | 466070  | 426996 | 593748  | 960473  | 1654240 | 599641  | 395123 | 291107 | 249500 | 252052 | 217687 | 220838 | 249014 | 179869  | 191380   | 6947778     |
| H2.2  | Heroin   | 532811  | 463937 | 630538  | 994402  | 1527403 | 588205  | 395325 | 299959 | 243759 | 231379 | 202762 | 209223 | 297134 | 1317573 | 156348   | 8090758     |
| H2.3  | Heroin   | 777958  | 708606 | 1080424 | 2243336 | 4214314 | 1627559 | 703852 | 435461 | 352795 | 396493 | 303018 | 295732 | 338359 | 205201  | 243829   | 13926937    |
| H2.4  | Heroin   | 512511  | 466351 | 780738  | 1559108 | 3201593 | 945944  | 537280 | 291644 | 237340 | 279487 | 202202 | 214505 | 268861 | 136180  | 172542   | 9806286     |
| H2.5  | Heroin   | 476399  | 429553 | 673357  | 1372016 | 3001626 | 848810  | 445851 | 248589 | 216837 | 269709 | 178912 | 171225 | 191179 | 109499  | 128841   | 8762403     |
| H2.6  | Heroin   | 436899  | 394558 | 835549  | 1459433 | 3616558 | 965405  | 441228 | 254615 | 225723 | 367706 | 218135 | 176505 | 176654 | 119111  | 138011   | 9825990     |
| H2.7  | Heroin   | 490589  | 458674 | 698704  | 1778760 | 3015080 | 1851966 | 465742 | 269989 | 200359 | 189014 | 156580 | 157273 | 169002 | 111433  | 122070   | 10135235    |
| H2.8  | Heroin   | 326157  | 306903 | 660744  | 1157637 | 2140788 | 552279  | 281771 | 175318 | 140497 | 158363 | 117290 | 110458 | 133160 | 87552   | 134459   | 6483376     |
| H2.9  | Heroin   | 471642  | 420126 | 630859  | 1197420 | 2496269 | 728815  | 381668 | 240296 | 198725 | 180769 | 160095 | 149139 | 169388 | 113230  | 127109   | 7682860     |
| H2.10 | Heroin   | 489738  | 423127 | 595421  | 1133591 | 2185368 | 796776  | 366630 | 238830 | 194536 | 200630 | 165388 | 164341 | 207059 | 119900  | 139999   | 7421334     |
| H3.1  | Heroin   | 617766  | 570861 | 898572  | 1395345 | 2522400 | 703807  | 432088 | 320233 | 270372 | 264020 | 212880 | 195137 | 182745 | 151579  | 162855   | 8897960     |
| H3.2  | Heroin   | 902518  | 795183 | 1014848 | 1615809 | 2905310 | 929984  | 578838 | 401789 | 330787 | 320571 | 256331 | 232856 | 227886 | 186748  | 193452   | 10892910    |
| H3.3  | Heroin   | 628665  | 577118 | 1075460 | 2269143 | 4614665 | 1125427 | 580602 | 338802 | 274296 | 301472 | 231583 | 203791 | 195846 | 164724  | 180999   | 12740051    |
| H3.4  | Heroin   | 665600  | 603122 | 1009782 | 1678638 | 3641404 | 864811  | 504279 | 337210 | 288993 | 292482 | 229796 | 212682 | 216552 | 184654  | 10904450 |             |
| H3.5  | Heroin   | 534800  | 529306 | 919374  | 3125180 | 3215100 | 954331  | 366489 | 225967 | 190005 | 193933 | 149450 | 132928 | 130166 | 106101  | 115335   | 10888465    |
| H3.6  | Heroin   | 659346  | 600298 | 1124045 | 2239406 | 4184974 | 977368  | 482149 | 321838 | 257411 | 264290 | 183445 | 177162 | 139190 | 145605  | 11963806 |             |
| H3.7  | Heroin   | 615225  | 557772 | 1009387 | 1810414 | 3584268 | 911998  | 458500 | 308680 | 249550 | 254404 | 206186 | 186845 | 178339 | 147094  | 169895   | 10646737    |
| H3.8  | Heroin   | 544098  | 502914 | 813549  | 2053428 | 2729138 | 825121  | 397704 | 259313 | 216297 | 215290 | 168003 | 150542 | 140917 | 115448  | 131909   | 9263671     |
| H3.9  | Heroin   | 571230  | 522613 | 811966  | 1394915 | 2132881 | 625873  | 379780 | 281516 | 242046 | 222764 | 193168 | 180015 | 171443 | 144797  | 151746   | 8026753     |
| H3.10 | Heroin   | 706629  | 655819 | 1047644 | 1835588 | 2945586 | 928155  | 486022 | 347969 | 287667 | 279848 | 217132 | 202192 | 197585 | 152903  | 184119   | 10474858    |
| M1.1  | Methampf | 705025  | 533021 | 592035  | 807344  | 1295357 | 626808  | 448431 | 366335 | 319743 | 301299 | 267602 | 255968 | 253449 | 226156  | 230126   | 7228699     |
| M1.2  | Methampf | 658207  | 513786 | 616684  | 937343  | 1702280 | 661275  | 448719 | 348165 | 299205 | 289983 | 249657 | 237430 | 235071 | 197354  | 200273   | 7595432     |
| M1.3  | Methampf | 403040  | 371292 | 466689  | 860942  | 1670219 | 571759  | 328126 | 227853 | 193685 | 222120 | 167870 | 151047 | 163008 | 144704  | 170447   | 6112801     |
| M1.4  | Methampf | 598865  | 474943 | 546745  | 736021  | 1342447 | 497685  | 359860 | 265928 | 227144 | 220789 | 174990 | 161519 | 153948 | 126050  | 128914   | 6015848     |
| M1.5  | Methampf | 610050  | 525259 | 709279  | 1170117 | 2526038 | 744049  | 453427 | 315362 | 266398 | 315925 | 223971 | 193019 | 186672 | 150602  | 158338   | 8548506     |
| M1.6  | Methampf | 578510  | 518616 | 777448  | 1433936 | 3003306 | 795974  | 445633 | 295108 | 249303 | 266218 | 195927 | 171959 | 166188 | 128905  | 146095   | 9173126     |
| M1.7  | Methampf | 518132  | 452545 | 538637  | 782642  | 1486471 | 561343  | 367365 | 278522 | 230580 | 227289 | 189314 | 169853 | 168653 | 139379  | 140056   | 6250781     |
| M1.8  | Methampf | 643817  | 531880 | 602770  | 964307  | 1830907 | 649783  | 387000 | 266671 | 217357 | 229589 | 175429 | 158176 | 156836 | 118968  | 121565   | 7055055     |
| M1.9  | Methampf | 643759  | 531823 | 711298  | 1277322 | 2701750 | 792944  | 457721 | 292227 | 237780 | 263480 | 192397 | 171867 | 174843 | 145195  | 168219   | 8762625     |
| M1.10 | Methampf | 764319  | 622701 | 781802  | 1266942 | 2841271 | 868623  | 524771 | 369424 | 325619 | 334346 | 259189 | 241559 | 237036 | 231359  | 216459   | 9885420     |
| M2.1  | Methampf | 460613  | 420391 | 657737  | 1190048 | 2467006 | 739254  | 403362 | 247437 | 207275 | 220684 | 179892 | 168389 | 173203 | 132777  | 146685   | 7814753     |
| M2.2  | Methampf | 371840  | 324358 | 453980  | 676736  | 1235937 | 398178  | 245340 | 175535 | 144899 | 132470 | 111225 | 111055 | 120249 | 87699   | 100693   | 4690194     |
| M2.3  | Methampf | 396251  | 370201 | 687438  | 1478252 | 3070070 | 801223  | 391653 | 218682 | 174104 | 178991 | 137583 | 128492 | 141110 | 106552  | 149353   | 8429955     |
| M2.4  | Methampf | 419344  | 388211 | 682773  | 1315539 | 2470571 | 737898  | 368597 | 238143 | 186925 | 191016 | 152603 | 143703 | 154617 | 112191  | 157183   | 7719314     |
| M2.5  | Methampf | 403741  | 352812 | 538734  | 998770  | 1786982 | 553071  | 323065 | 200134 | 161223 | 158994 | 129820 | 125689 | 136639 | 91678   | 102950   | 6064302     |
| M2.6  | Methampf | 402997  | 362319 | 665603  | 1468628 | 3481151 | 882655  | 404455 | 204837 | 158864 | 219033 | 142352 | 116353 | 124413 | 91229   | 114711   | 8839600     |
| M2.7  | Methampf | 488019  | 403235 | 567682  | 1178688 | 3188737 | 971553  | 510131 | 273571 | 230784 | 342277 | 218475 | 179694 | 186018 | 142869  | 144708   | 9026441     |
| M2.8  | Methampf | 502697  | 461627 | 809210  | 1396159 | 3054716 | 745410  | 381302 | 257550 | 207327 | 208204 | 173676 | 167310 | 169658 | 136414  | 131880   | 8803140     |
| M2.9  | Methampf | 397053  | 373315 | 671318  | 1996989 | 3658746 | 1277557 | 504024 | 230794 | 180535 | 252391 | 159930 | 139913 | 153577 | 121881  | 146886   | 10264909    |
| M2.10 | Methampf | 437183  | 409539 | 873020  | 1715483 | 2678005 | 746998  | 388261 | 244080 | 195270 | 201955 | 162037 | 147278 | 153618 | 124839  | 142757   | 8620323     |
| M3.1  | Methampf | 819002  | 724017 | 936730  | 1600098 | 2745948 | 970661  | 622869 | 454596 | 392031 | 399414 | 339215 | 336325 | 363685 | 258302  | 267308   | 11235601    |
| M3.2  | Methampf | 899067  | 808225 | 1099107 | 1707278 | 3679889 | 1059948 | 673551 | 457628 | 383536 | 408011 | 321124 | 282630 | 263987 | 211628  | 211876   | 12467485    |
| M3.   |          |         |        |         |         |         |         |        |        |        |        |        |        |        |         |          |             |



**Supplementary Table 8. miRNA with Significant changes in HDPs relative to HCs**

| Gene_ID          | Foldchange | p.value  | FDR      |
|------------------|------------|----------|----------|
| hsa-miR-375-3p   | -1.82      | 2.76E-05 | 1.29E-03 |
| hsa-miR-484      | -1.71      | 8.08E-06 | 6.36E-04 |
| hsa-miR-205-5p   | -1.62      | 3.29E-04 | 7.56E-03 |
| hsa-miR-451a     | -1.52      | 2.51E-06 | 3.53E-04 |
| hsa-miR-548b-5p  | -1.52      | 2.56E-06 | 3.53E-04 |
| hsa-miR-363-3p   | -1.47      | 6.15E-08 | 3.39E-05 |
| hsa-miR-132-3p   | -1.43      | 2.12E-04 | 5.55E-03 |
| hsa-miR-18a-3p   | -1.42      | 1.16E-03 | 0.020    |
| hsa-miR-92b-3p   | -1.32      | 7.59E-05 | 2.61E-03 |
| hsa-miR-548c-5p  | -1.30      | 1.67E-05 | 1.15E-03 |
| hsa-miR-576-5p   | -1.23      | 1.78E-06 | 3.53E-04 |
| hsa-miR-548d-5p  | -1.18      | 7.86E-06 | 6.36E-04 |
| hsa-miR-214-3p   | -1.14      | 1.65E-04 | 4.98E-03 |
| hsa-miR-1180-3p  | -1.12      | 4.54E-05 | 1.79E-03 |
| hsa-miR-92a-3p   | -1.09      | 4.68E-06 | 5.16E-04 |
| hsa-miR-3158-3p  | -1.08      | 1.92E-03 | 0.028    |
| hsa-miR-181a-5p  | -1.04      | 4.37E-05 | 1.79E-03 |
| hsa-miR-7-1-3p   | -1.03      | 2.66E-04 | 6.67E-03 |
| hsa-miR-32-5p    | -1.01      | 2.43E-05 | 1.29E-03 |
| hsa-miR-486-5p   | -0.98      | 2.07E-04 | 5.55E-03 |
| hsa-miR-22-3p    | -0.92      | 4.25E-04 | 8.68E-03 |
| hsa-miR-4742-3p  | -0.90      | 2.91E-03 | 0.035    |
| hsa-miR-671-5p   | -0.88      | 3.86E-03 | 0.043    |
| hsa-miR-101-3p   | -0.82      | 1.58E-03 | 0.025    |
| hsa-miR-181d-5p  | -0.82      | 2.75E-03 | 0.035    |
| hsa-miR-181b-5p  | -0.81      | 2.94E-03 | 0.035    |
| hsa-miR-3150b-3p | -0.78      | 4.43E-03 | 0.048    |
| hsa-miR-16-5p    | -0.78      | 1.50E-04 | 4.87E-03 |
| hsa-miR-629-5p   | -0.75      | 1.62E-03 | 0.025    |
| hsa-miR-20a-5p   | -0.71      | 2.81E-04 | 6.74E-03 |
| hsa-miR-425-5p   | -0.70      | 2.82E-05 | 1.29E-03 |
| hsa-miR-4732-3p  | -0.64      | 2.70E-03 | 0.035    |
| hsa-miR-15a-5p   | -0.63      | 3.60E-03 | 0.041    |
| hsa-miR-21-5p    | -0.61      | 1.12E-03 | 0.020    |
| hsa-miR-7-5p     | -0.61      | 2.37E-05 | 1.29E-03 |
| hsa-miR-4286     | 0.59       | 2.76E-03 | 0.035    |
| hsa-miR-6514-5p  | 0.63       | 1.72E-04 | 4.98E-03 |
| hsa-miR-151b     | 0.78       | 9.03E-04 | 0.017    |
| hsa-miR-151a-5p  | 0.81       | 3.62E-04 | 7.98E-03 |
| hsa-miR-744-5p   | 1.01       | 3.85E-04 | 8.16E-03 |
| hsa-miR-6721-5p  | 1.12       | 3.02E-03 | 0.035    |
| hsa-miR-432-5p   | 1.23       | 1.57E-03 | 0.025    |
| hsa-miR-191-3p   | 1.24       | 1.92E-03 | 0.028    |

**Supplementary Table 9. miRNA with Significant changes in MDPs relative to HCs**

| Gene_id          | Foldchange(log2) | p.value  | FDR      |
|------------------|------------------|----------|----------|
| hsa-miR-375-3p   | -1.98            | 3.89E-05 | 3.20E-03 |
| hsa-miR-484      | -1.58            | 4.06E-05 | 3.20E-03 |
| hsa-miR-129-5p   | -1.37            | 2.24E-03 | 0.040    |
| hsa-miR-548b-5p  | -1.34            | 6.57E-06 | 1.81E-03 |
| hsa-miR-451a     | -1.26            | 1.97E-05 | 2.81E-03 |
| hsa-miR-548c-5p  | -1.11            | 1.16E-04 | 6.15E-03 |
| hsa-miR-92b-3p   | -1.08            | 5.17E-04 | 0.017    |
| hsa-miR-548d-5p  | -1.05            | 5.41E-07 | 2.98E-04 |
| hsa-miR-486-5p   | -1.02            | 1.34E-04 | 6.15E-03 |
| hsa-miR-363-3p   | -0.99            | 2.04E-05 | 2.81E-03 |
| hsa-miR-636      | -0.99            | 1.54E-03 | 0.035    |
| hsa-miR-1180-3p  | -0.98            | 1.81E-04 | 7.69E-03 |
| hsa-miR-92a-3p   | -0.92            | 4.06E-05 | 3.20E-03 |
| hsa-miR-3150b-3p | -0.87            | 1.82E-03 | 0.035    |
| hsa-miR-4732-3p  | -0.86            | 1.34E-04 | 6.15E-03 |
| hsa-miR-5010-3p  | -0.85            | 1.78E-03 | 0.035    |
| hsa-miR-629-5p   | -0.76            | 1.04E-03 | 0.027    |
| hsa-miR-16-5p    | -0.67            | 7.29E-04 | 0.020    |
| hsa-miR-576-5p   | -0.66            | 1.86E-03 | 0.035    |
| hsa-miR-4286     | 0.69             | 5.28E-04 | 0.017    |
| hsa-miR-151a-3p  | 0.73             | 5.06E-04 | 0.017    |
| hsa-miR-151b     | 0.73             | 1.49E-03 | 0.035    |
| hsa-miR-151a-5p  | 0.75             | 6.71E-04 | 0.019    |
| hsa-miR-548a-3p  | 0.79             | 2.45E-03 | 0.040    |
| hsa-miR-338-3p   | 0.81             | 2.50E-03 | 0.040    |
| hsa-miR-744-5p   | 0.83             | 1.62E-03 | 0.035    |
